# Supplementary material
Source: MDPI journal article supplement (https://www.mdpi.com/search?q=molecules-21-01239)
Supplement: s001 [file molecules-21-01239-s001.pdf]

# Supplementary Materials: Chemical Constituents from *Flueggea virosa* and the Structural Revision of Dehydrochebulic Acid Trimethyl Ester

Chih-Hua Chao, Ying-Ju Lin, Ju-Chien Cheng, Hui-Chi Huang, Yung-Ju Yeh, Tian-Shung Wu, Syh-Yuan Hwang and Yang-Chang Wu

**Table S1.** Crystal data and structure refinement for fvs9r1.

|                                   |                                             |                     |
|-----------------------------------|---------------------------------------------|---------------------|
| Identification code               | fvs9r1                                      |                     |
| Empirical formula                 | C17 H16 O11                                 |                     |
| Formula weight                    | 396.30                                      |                     |
| Temperature                       | 150(2) K                                    |                     |
| Wavelength                        | 1.54178 Å                                   |                     |
| Crystal system                    | Orthorhombic                                |                     |
| Space group                       | P 21 21 21                                  |                     |
| Unit cell dimensions              | a = 7.1567(2) Å                             | $\alpha = 90^\circ$ |
|                                   | b = 9.7147(3) Å                             | $\beta = 90^\circ$  |
|                                   | c = 25.1934(7) Å                            | $\gamma = 90^\circ$ |
| Volume                            | 1751.58(9) Å <sup>3</sup>                   |                     |
| Z                                 | 4                                           |                     |
| Density (calculated)              | 1.503 Mg/m <sup>3</sup>                     |                     |
| Absorption coefficient            | 1.115 mm <sup>-1</sup>                      |                     |
| F(000)                            | 824                                         |                     |
| Crystal size                      | 0.62 × 0.50 × 0.47 mm <sup>3</sup>          |                     |
| Theta range for data collection   | 3.51 to 72.25°.                             |                     |
| Index ranges                      | −8 ≤ h ≤ 8, −7 ≤ k ≤ 11, −30 ≤ l ≤ 27       |                     |
| Reflections collected             | 6642                                        |                     |
| Independent reflections           | 3372 [R(int) = 0.0199]                      |                     |
| Completeness to theta = 72.25°    | 98.7%                                       |                     |
| Absorption correction             | Semi-empirical from equivalents             |                     |
| Max. and min. transmission        | 1.00000 and 0.83165                         |                     |
| Refinement method                 | Full-matrix least-squares on F <sup>2</sup> |                     |
| Data/restraints/parameters        | 3372/0/266                                  |                     |
| Goodness-of-fit on F <sup>2</sup> | 1.028                                       |                     |
| Final R indices [I > 2σ(I)]       | R1 = 0.0298, wR2 = 0.0787                   |                     |
| R indices (all data)              | R1 = 0.0315, wR2 = 0.0800                   |                     |
| Absolute structure parameter      | 0.09(14)                                    |                     |
| Extinction coefficient            | 0.0045(3)                                   |                     |
| Largest diff. peak and hole       | 0.227 and −0.168 e.Å <sup>-3</sup>          |                     |

**Table S2.** Atomic coordinates ( $\times 10^4$ ) and equivalent isotropic displacement parameters ( $\text{\AA}^2 \times 10^3$ ) for fvs9r1.  $U(\text{eq})$  is defined as one third of the trace of the orthogonalized  $U^{ij}$  tensor.

|       | x        | y        | z       | U(eq) |
|-------|----------|----------|---------|-------|
| O(1)  | 4716(2)  | 10511(1) | 2042(1) | 19(1) |
| O(2)  | 5475(2)  | 8722(1)  | 2531(1) | 26(1) |
| O(3)  | 3367(2)  | 4544(1)  | 1490(1) | 26(1) |
| O(4)  | 2345(2)  | 5588(1)  | 521(1)  | 24(1) |
| O(5)  | 2358(2)  | 8376(1)  | 353(1)  | 25(1) |
| O(6)  | 8085(2)  | 8738(1)  | 1413(1) | 27(1) |
| O(7)  | 7303(2)  | 7666(1)  | 656(1)  | 28(1) |
| O(8)  | 6780(2)  | 12838(1) | 597(1)  | 28(1) |
| O(9)  | 3650(2)  | 12774(1) | 509(1)  | 25(1) |
| O(10) | 423(2)   | 11957(1) | 1643(1) | 29(1) |
| O(11) | 1048(2)  | 10428(1) | 2290(1) | 33(1) |
| C(1)  | 4725(2)  | 9135(2)  | 2130(1) | 18(1) |
| C(2)  | 3949(2)  | 8238(2)  | 1718(1) | 16(1) |
| C(3)  | 3924(2)  | 6831(2)  | 1820(1) | 16(1) |
| C(4)  | 3399(2)  | 5932(2)  | 1424(1) | 17(1) |
| C(5)  | 2875(2)  | 6431(2)  | 924(1)  | 16(1) |
| C(6)  | 2874(2)  | 7850(2)  | 828(1)  | 16(1) |
| C(7)  | 3427(2)  | 8764(2)  | 1222(1) | 15(1) |
| C(8)  | 3539(2)  | 10298(2) | 1122(1) | 16(1) |
| C(9)  | 3441(2)  | 11060(2) | 1658(1) | 17(1) |
| C(10) | 5278(2)  | 10779(2) | 825(1)  | 17(1) |
| C(11) | 6860(2)  | 10105(2) | 744(1)  | 20(1) |
| C(12) | 7380(2)  | 8683(2)  | 925(1)  | 19(1) |
| C(13) | 8741(3)  | 7450(2)  | 1641(1) | 35(1) |
| C(14) | 5118(2)  | 12233(2) | 621(1)  | 20(1) |
| C(15) | 6830(3)  | 14231(2) | 393(1)  | 36(1) |
| C(16) | 1484(2)  | 11078(2) | 1907(1) | 21(1) |
| C(17) | -1398(3) | 12244(2) | 1869(1) | 37(1) |

**Table S3.** Bond lengths [ $\text{\AA}$ ] and angles [ $^\circ$ ] for fvs9r1.

|             |            |
|-------------|------------|
| O(1)-C(1)   | 1.3545(18) |
| O(1)-C(9)   | 1.4330(19) |
| O(2)-C(1)   | 1.2130(19) |
| O(3)-C(4)   | 1.3599(18) |
| O(3)-H(3A)  | 0.82(3)    |
| O(4)-C(5)   | 1.3583(19) |
| O(4)-H(4A)  | 0.87(3)    |
| O(5)-C(6)   | 1.3542(18) |
| O(5)-H(5A)  | 0.80(2)    |
| O(6)-C(12)  | 1.330(2)   |
| O(6)-C(13)  | 1.454(2)   |
| O(7)-C(12)  | 1.200(2)   |
| O(8)-C(14)  | 1.328(2)   |
| O(8)-C(15)  | 1.447(2)   |
| O(9)-C(14)  | 1.208(2)   |
| O(10)-C(16) | 1.321(2)   |
| O(10)-C(17) | 1.449(2)   |
| O(11)-C(16) | 1.194(2)   |
| C(1)-C(2)   | 1.464(2)   |

|                   |            |
|-------------------|------------|
| C(2)-C(3)         | 1.391(2)   |
| C(2)-C(7)         | 1.400(2)   |
| C(3)-C(4)         | 1.378(2)   |
| C(3)-H(3B)        | 0.95       |
| C(4)-C(5)         | 1.399(2)   |
| C(5)-C(6)         | 1.399(2)   |
| C(6)-C(7)         | 1.390(2)   |
| C(7)-C(8)         | 1.514(2)   |
| C(8)-C(10)        | 1.526(2)   |
| C(8)-C(9)         | 1.541(2)   |
| C(8)-H(8A)        | 1          |
| C(9)-C(16)        | 1.535(2)   |
| C(9)-H(9A)        | 1          |
| C(10)-C(11)       | 1.324(2)   |
| C(10)-C(14)       | 1.507(2)   |
| C(11)-C(12)       | 1.501(2)   |
| C(11)-H(11A)      | 0.95       |
| C(13)-H(13A)      | 0.98       |
| C(13)-H(13B)      | 0.98       |
| C(13)-H(13C)      | 0.98       |
| C(15)-H(15A)      | 0.98       |
| C(15)-H(15B)      | 0.98       |
| C(15)-H(15C)      | 0.98       |
| C(17)-H(17A)      | 0.98       |
| C(17)-H(17B)      | 0.98       |
| C(17)-H(17C)      | 0.98       |
| C(1)-O(1)-C(9)    | 118.72(12) |
| C(4)-O(3)-H(3A)   | 108.5(19)  |
| C(5)-O(4)-H(4A)   | 108(2)     |
| C(6)-O(5)-H(5A)   | 110.0(16)  |
| C(12)-O(6)-C(13)  | 116.93(14) |
| C(14)-O(8)-C(15)  | 116.90(15) |
| C(16)-O(10)-C(17) | 116.32(14) |
| O(2)-C(1)-O(1)    | 117.67(14) |
| O(2)-C(1)-C(2)    | 124.17(15) |
| O(1)-C(1)-C(2)    | 118.01(13) |
| C(3)-C(2)-C(7)    | 121.25(14) |
| C(3)-C(2)-C(1)    | 117.37(14) |
| C(7)-C(2)-C(1)    | 121.08(14) |
| C(4)-C(3)-C(2)    | 119.56(13) |
| C(4)-C(3)-H(3B)   | 120.2      |
| C(2)-C(3)-H(3B)   | 120.2      |
| O(3)-C(4)-C(3)    | 122.92(14) |
| O(3)-C(4)-C(5)    | 116.76(14) |
| C(3)-C(4)-C(5)    | 120.31(14) |
| O(4)-C(5)-C(4)    | 122.59(14) |
| O(4)-C(5)-C(6)    | 117.64(14) |
| C(4)-C(5)-C(6)    | 119.77(14) |
| O(5)-C(6)-C(7)    | 117.95(13) |
| O(5)-C(6)-C(5)    | 121.66(14) |
| C(7)-C(6)-C(5)    | 120.38(14) |
| C(6)-C(7)-C(2)    | 118.71(14) |
| C(6)-C(7)-C(8)    | 121.66(13) |
| C(2)-C(7)-C(8)    | 119.60(13) |

|                     |            |
|---------------------|------------|
| C(7)-C(8)-C(10)     | 115.24(14) |
| C(7)-C(8)-C(9)      | 108.89(12) |
| C(10)-C(8)-C(9)     | 108.65(12) |
| C(7)-C(8)-H(8A)     | 107.9      |
| C(10)-C(8)-H(8A)    | 107.9      |
| C(9)-C(8)-H(8A)     | 107.9      |
| O(1)-C(9)-C(16)     | 108.02(12) |
| O(1)-C(9)-C(8)      | 112.60(12) |
| C(16)-C(9)-C(8)     | 113.89(13) |
| O(1)-C(9)-H(9A)     | 107.3      |
| C(16)-C(9)-H(9A)    | 107.3      |
| C(8)-C(9)-H(9A)     | 107.3      |
| C(11)-C(10)-C(14)   | 118.44(14) |
| C(11)-C(10)-C(8)    | 128.47(15) |
| C(14)-C(10)-C(8)    | 113.06(14) |
| C(10)-C(11)-C(12)   | 128.32(15) |
| C(10)-C(11)-H(11A)  | 115.8      |
| C(12)-C(11)-H(11A)  | 115.8      |
| O(7)-C(12)-O(6)     | 124.94(15) |
| O(7)-C(12)-C(11)    | 125.06(14) |
| O(6)-C(12)-C(11)    | 109.78(13) |
| O(6)-C(13)-H(13A)   | 109.5      |
| O(6)-C(13)-H(13B)   | 109.5      |
| H(13A)-C(13)-H(13B) | 109.5      |
| O(6)-C(13)-H(13C)   | 109.5      |
| H(13A)-C(13)-H(13C) | 109.5      |
| H(13B)-C(13)-H(13C) | 109.5      |
| O(9)-C(14)-O(8)     | 125.12(14) |
| O(9)-C(14)-C(10)    | 123.61(15) |
| O(8)-C(14)-C(10)    | 111.25(14) |
| O(8)-C(15)-H(15A)   | 109.5      |
| O(8)-C(15)-H(15B)   | 109.5      |
| H(15A)-C(15)-H(15B) | 109.5      |
| O(8)-C(15)-H(15C)   | 109.5      |
| H(15A)-C(15)-H(15C) | 109.5      |
| H(15B)-C(15)-H(15C) | 109.5      |
| O(11)-C(16)-O(10)   | 126.71(17) |
| O(11)-C(16)-C(9)    | 124.19(17) |
| O(10)-C(16)-C(9)    | 109.05(13) |
| O(10)-C(17)-H(17A)  | 109.5      |
| O(10)-C(17)-H(17B)  | 109.5      |
| H(17A)-C(17)-H(17B) | 109.5      |
| O(10)-C(17)-H(17C)  | 109.5      |
| H(17A)-C(17)-H(17C) | 109.5      |
| H(17B)-C(17)-H(17C) | 109.5      |

Symmetry transformations used to generate equivalent atoms.

**Table S4.** Anisotropic displacement parameters ( $\text{\AA}^2 \times 10^3$ ) for fvs9r1. The anisotropic displacement factor exponent takes the form:  $-2\pi^2[h^2 \cdot a^* \cdot U^{11} + \dots + 2 h \cdot k \cdot a^* \cdot b^* \cdot U^{12}]$ .

|       | $U^{11}$ | $U^{22}$ | $U^{33}$ | $U^{23}$ | $U^{13}$ | $U^{12}$ |
|-------|----------|----------|----------|----------|----------|----------|
| O(1)  | 30(1)    | 12(1)    | 16(1)    | -2(1)    | -3(1)    | -2(1)    |
| O(2)  | 45(1)    | 17(1)    | 16(1)    | -1(1)    | -11(1)   | -2(1)    |
| O(3)  | 51(1)    | 9(1)     | 16(1)    | 2(1)     | -9(1)    | -2(1)    |
| O(4)  | 44(1)    | 11(1)    | 18(1)    | -2(1)    | -11(1)   | -1(1)    |
| O(5)  | 50(1)    | 11(1)    | 14(1)    | 0(1)     | -10(1)   | 1(1)     |
| O(6)  | 33(1)    | 23(1)    | 24(1)    | 3(1)     | -4(1)    | 1(1)     |
| O(7)  | 47(1)    | 16(1)    | 23(1)    | -1(1)    | 6(1)     | 4(1)     |
| O(8)  | 36(1)    | 14(1)    | 34(1)    | 7(1)     | 10(1)    | -1(1)    |
| O(9)  | 39(1)    | 13(1)    | 24(1)    | 2(1)     | -4(1)    | 2(1)     |
| O(10) | 27(1)    | 28(1)    | 31(1)    | 3(1)     | 4(1)     | 2(1)     |
| O(11) | 43(1)    | 31(1)    | 26(1)    | 4(1)     | 12(1)    | -5(1)    |
| C(1)  | 25(1)    | 14(1)    | 15(1)    | -1(1)    | 0(1)     | -2(1)    |
| C(2)  | 21(1)    | 13(1)    | 13(1)    | -1(1)    | 0(1)     | 0(1)     |
| C(3)  | 26(1)    | 14(1)    | 10(1)    | 3(1)     | -3(1)    | 0(1)     |
| C(4)  | 23(1)    | 10(1)    | 17(1)    | 2(1)     | -1(1)    | -1(1)    |
| C(5)  | 23(1)    | 11(1)    | 14(1)    | -2(1)    | -3(1)    | -2(1)    |
| C(6)  | 24(1)    | 13(1)    | 11(1)    | 2(1)     | -1(1)    | 1(1)     |
| C(7)  | 21(1)    | 11(1)    | 13(1)    | 0(1)     | 1(1)     | -1(1)    |
| C(8)  | 24(1)    | 10(1)    | 13(1)    | -2(1)    | 0(1)     | -1(1)    |
| C(9)  | 27(1)    | 10(1)    | 14(1)    | -1(1)    | 1(1)     | 0(1)     |
| C(10) | 30(1)    | 11(1)    | 11(1)    | 0(1)     | 1(1)     | -2(1)    |
| C(11) | 30(1)    | 14(1)    | 16(1)    | 0(1)     | 3(1)     | -3(1)    |
| C(12) | 22(1)    | 17(1)    | 18(1)    | 1(1)     | 5(1)     | 1(1)     |
| C(13) | 31(1)    | 36(1)    | 37(1)    | 16(1)    | -3(1)    | 5(1)     |
| C(14) | 35(1)    | 12(1)    | 12(1)    | -1(1)    | 4(1)     | 0(1)     |
| C(15) | 48(1)    | 13(1)    | 47(1)    | 9(1)     | 19(1)    | -1(1)    |
| C(16) | 30(1)    | 14(1)    | 19(1)    | -6(1)    | 4(1)     | -4(1)    |
| C(17) | 26(1)    | 49(1)    | 37(1)    | -9(1)    | 2(1)     | 4(1)     |

**Table S5.** Hydrogen coordinates ( $\times 10^4$ ) and isotropic displacement parameters ( $\text{\AA}^2 \times 10^3$ ) for fvs9r1.

|        | <b>x</b> | <b>y</b> | <b>z</b> | <b>U(eq)</b> |
|--------|----------|----------|----------|--------------|
| H(3A)  | 3660(40) | 4370(30) | 1799(11) | 52(8)        |
| H(4A)  | 2620(40) | 4750(30) | 610(12)  | 66(9)        |
| H(5A)  | 2260(30) | 7770(20) | 140(9)   | 31(6)        |
| H(3B)  | 4266     | 6492     | 2160     | 20           |
| H(8A)  | 2420     | 10571    | 908      | 19           |
| H(9A)  | 3810     | 12037    | 1592     | 21           |
| H(11A) | 7785     | 10582    | 546      | 24           |
| H(13A) | 9220     | 7618     | 1999     | 52           |
| H(13B) | 9742     | 7072     | 1419     | 52           |
| H(13C) | 7705     | 6793     | 1658     | 52           |
| H(15A) | 8121     | 14567    | 394      | 55           |
| H(15B) | 6058     | 14827    | 618      | 55           |
| H(15C) | 6345     | 14242    | 29       | 55           |
| H(17A) | -2059    | 12906    | 1644     | 56           |
| H(17B) | -1245    | 12630    | 2226     | 56           |
| H(17C) | -2120    | 11389    | 1891     | 56           |
